# Supplementary material
Source: PubMed Central journal article supplement (PMC5500174)
Supplement: NIHMS869740-supplement-suppl.pdf [file NIHMS869740-supplement-suppl.pdf]

## Supplementary Methods

### MAME Cultures of TNBC Cells $\pm$ MF:HGF or CAFs

MDA-MB-231 and HCC70 cells were grown as mono-cultures or in co-cultures with CAF or MF:HGF cells. Details for establishing and analyzing MAME cultures are described in detail in text and video (34). For co-culture a ratio of 5:1 of tumor cells and fibroblasts, respectively, was used. Cells were seeded on glass coverslips coated with 50  $\mu$ l rBM, overlaid with 2% rBM and grown for periods up to 10 days. Cells were treated with XL184 starting at the day of seeding or 4 days after seeding; XL184 was replaced every 2 days. Cells were grown for 6 days after the initial addition of XL184 and imaged live on a Zeiss LSM 510 Meta NLO microscope with a water-dipping objective. Z-stack images were acquired; Volocity software (Perkin Elmer) was used to generate 3-D reconstructions of the Z-stack images, quantify volumes and segment 3D structures into central cores and invasive outgrowths before quantifying volumes.

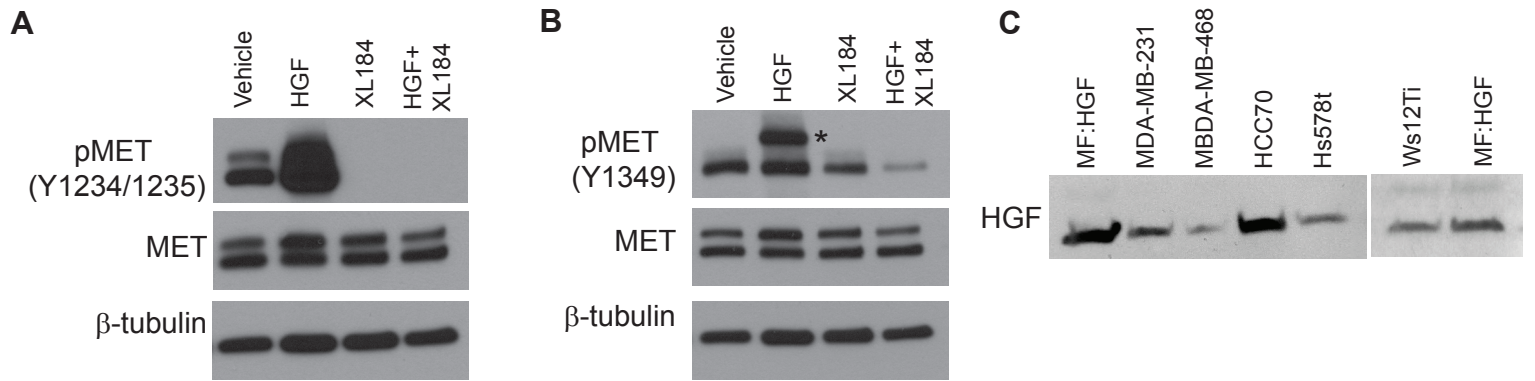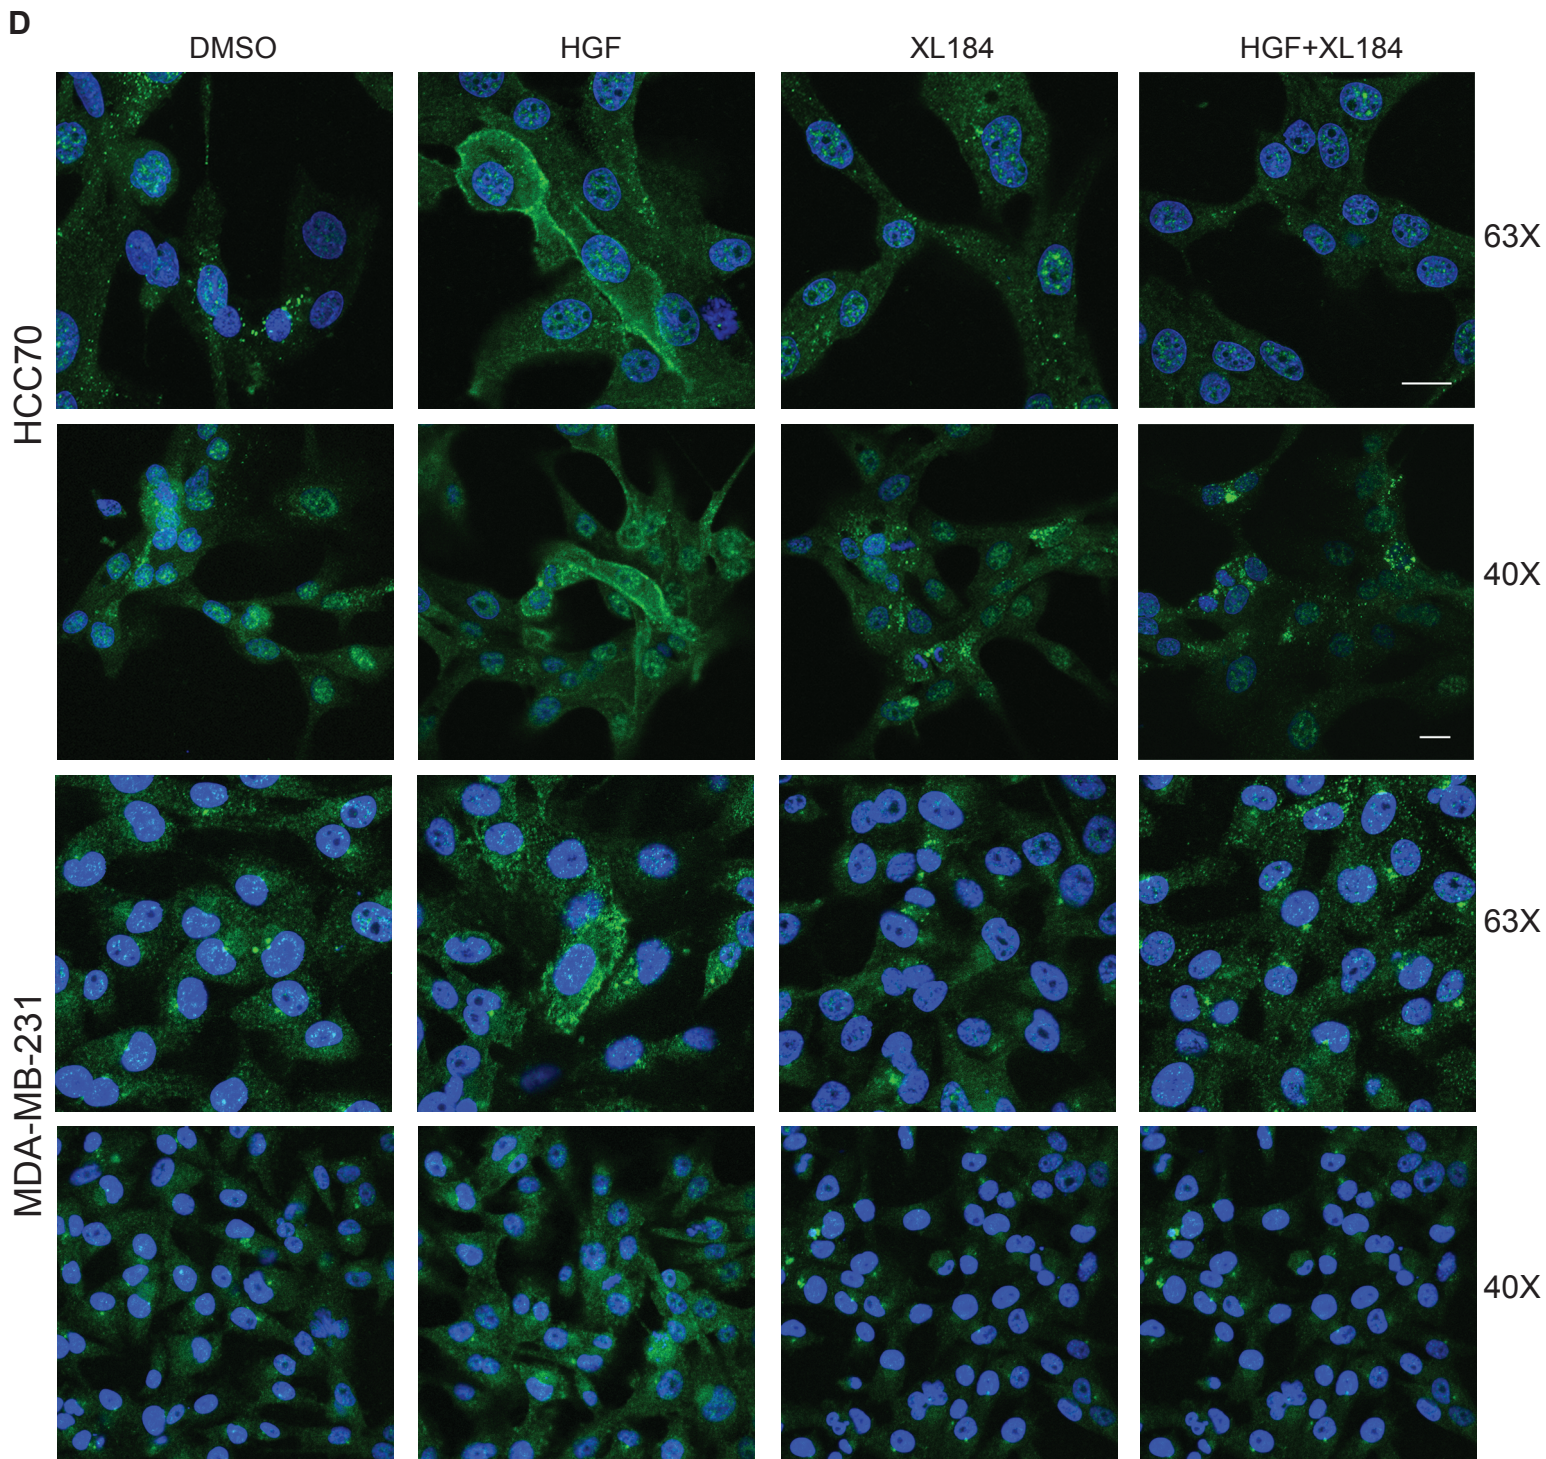

**Supplemental Figure 1: Immunoblot and immunofluorescence analysis of MET and HGF in TNBC and fibroblast cell lines.** A) HGF induces high levels of MET Y1234/1235 phosphorylation in HCC70 cells which is completely inhibited in the presence of XL184. B) HGF induction of MET Y1349 phosphorylation was observed (upper band as noted by \*) which is inhibited by XL184 treatment. C) HGF expression was examined in the conditioned media of TNBC cell lines, normal mammary fibroblasts (MF:HGF) and CAF cells Ws12Ti. D) Confocal immunofluorescence analysis of pMET (Y1234/Y1235) in HCC70 and MDA-MB-231 cells is shown at 40X and 63X. Cells were treated with DMSO, XL184 (2 $\mu$  uM), HGF(100 ng/mL), or XL184 + HGF. Blue pseudocolor represents DAPI nuclear stain. Scale = 20  $\mu$ m.

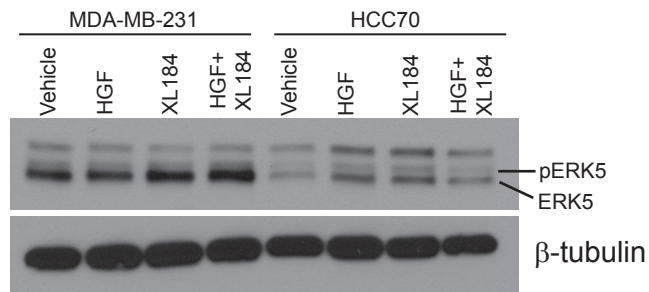

**Supplemental Figure 2 – Met inhibition has minimal effect on ERK5 signaling in human TNBC cells.** Immunoblot analysis was used to evaluate the effect of XL184 treatment on ERK5 signaling in MDA-MB-231 and HCC70 TNBC cells diverse TNBC cell lines. Cells were serum starved, treated with HGF or HGF + XL184 and then harvested 24 hrs later. Total ERK5 expression was slightly upregulated in MDA-MB-231 cells treated with XL184. However no difference in pERK5 (see upshifted band) was observed with HGF or HGF+XL184 treatment.

**A**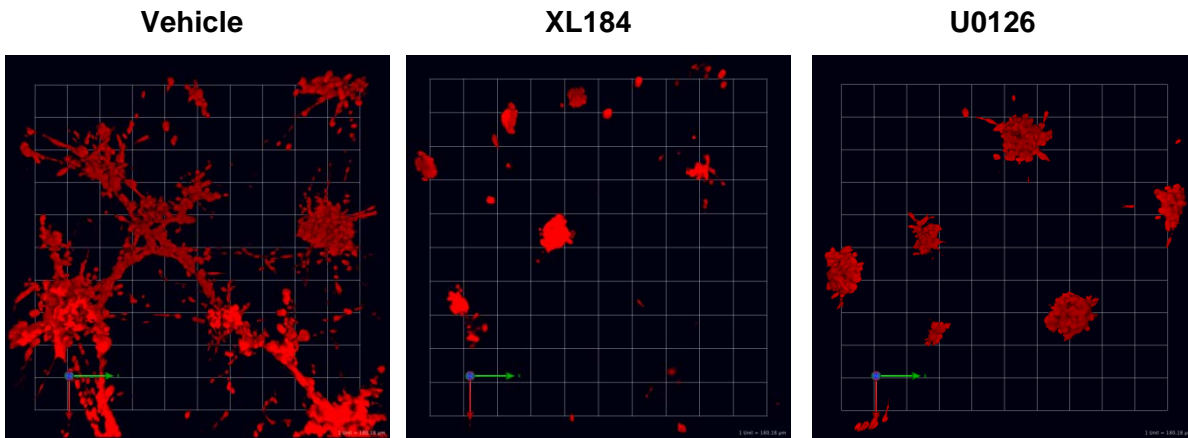**B**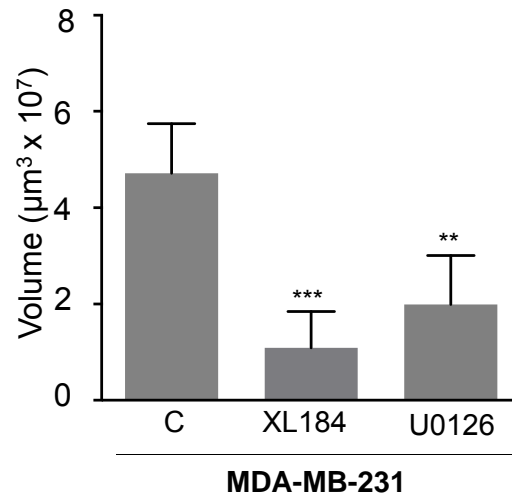

**Supplemental Figure 3 – XL184 and U0126 significantly reduce volume and outgrowths of MDA-MB-231 structures.** MDA-MB-231- lenti RFP (red) were seeded on rBM overly cultures, drugs were added at day 4 (2  $\mu\text{M}$  XL-184, 10  $\mu\text{M}$  U0126), and were imaged at day 10. (A) Representative 3D reconstructions were used to illustrate volume of MDA-MD-231 structures; one grid unit = 180  $\mu\text{m}$ . (B) Volumes of MDA-MD-231 structures were quantified in 64 fields (16 fields/experiment and four independent experiments) and p-values were calculated by Student's t-tests (\*\*  $p < 0.01$ , \*\*\*  $p \leq 0.0005$ ).

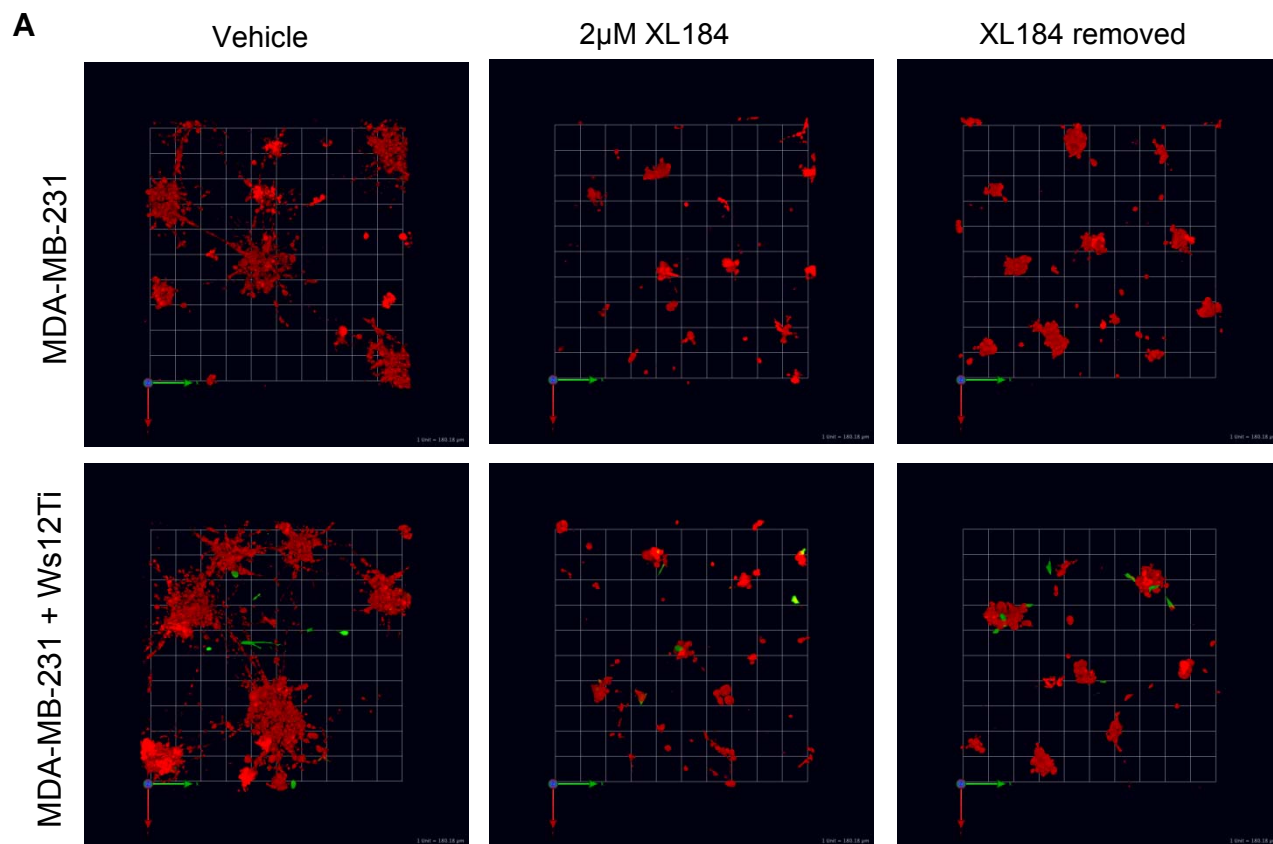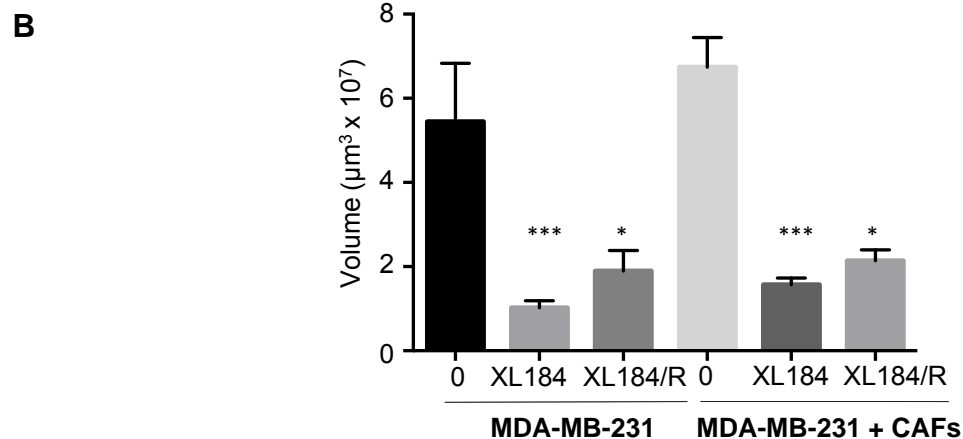

**Supplemental Figure 4 – Minimal growth recovery is observed after XL184 removal.**

A) MDA-MB-231- lenti RFP (red) alone or together with Ws12Ti cells (green) were seeded on rBM overlay cultures. Vehicle control or 2  $\mu$ M XL184 were added at day 0 and replaced every other day. XL184 was removed at day 6 and all structures were imaged at day 12. Panels on left are 3D reconstructions of Z-stacks of MDA-MB-231 and MDA-MB-231+CAFs with vehicle control; panels in middle (one grid unit = 180  $\mu$ m). B) Volumes of structures were quantified in 64 fields (16 fields/experiment ; four independent experiments) and p-values were calculated by Student's t-tests (\*\* p < 0.01, \*\*\* p  $\leq$  0.0005).

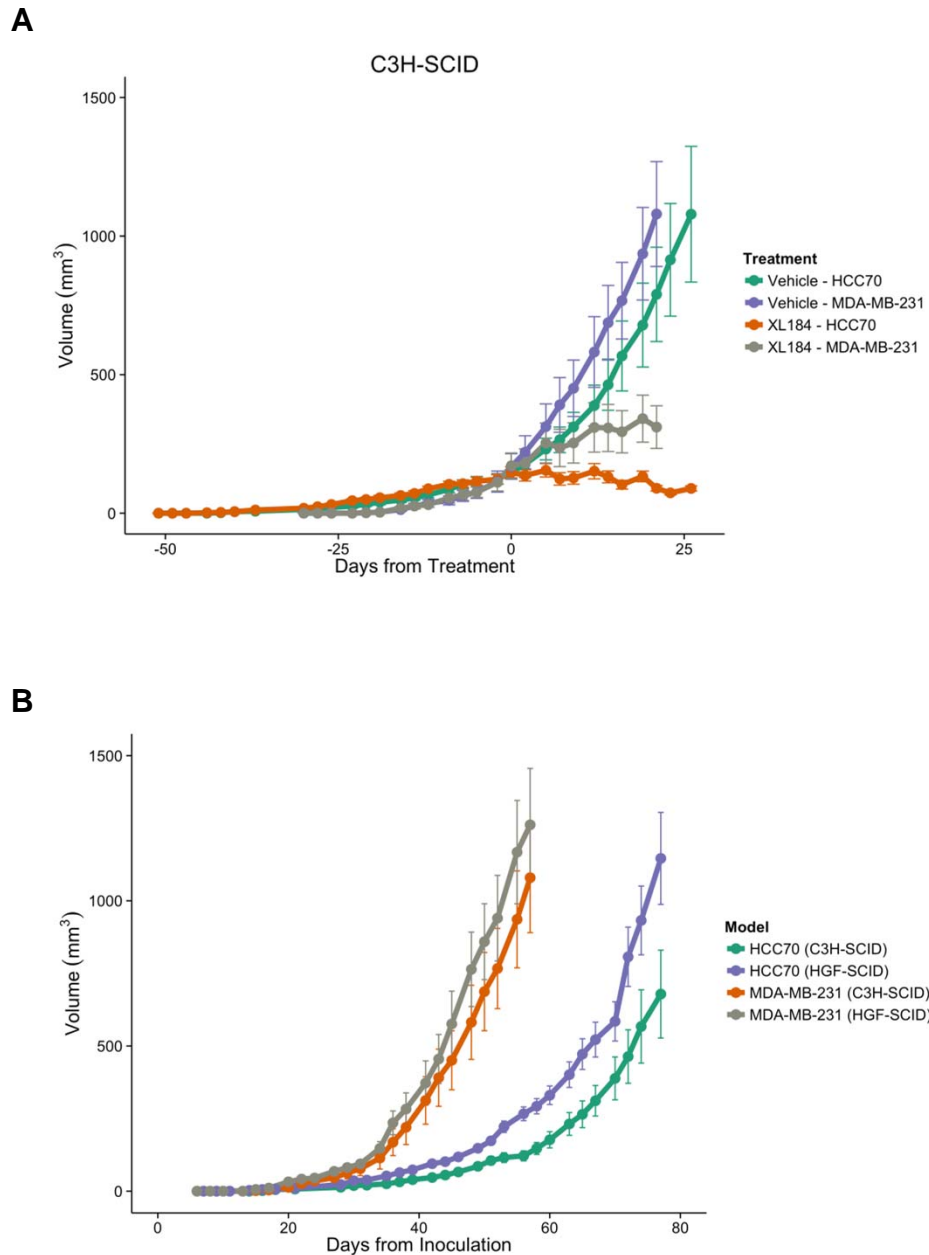

**Supplemental Figure 5: MET inhibition in C3H-SCID mice.** A) Growth of orthotopic MDA-MB-231 and HCC70 tumors in C3H-SCID mice was significantly inhibited by 30 mg/kg XL184 treatment (MDA-MB-231,  $p < 0.035$ ; HCC70  $p < 0.0001$ ). B) Growth of orthotopic MDA-MB-231 and HCC70 tumors in HGF-SCID and C3H-SCID mice is shown from time of inoculation. Tumor measurement started 7 days after inoculation. A significant increase in growth rate was observed for HCC70 cells in HGF-SCID mice ( $p < 0.036$ ). Linear mixed-effects modeling was used to test for significant differences in tumor growth.
